# Supplementary material for: Human fascioliasis in Africa: A systematic review
Source: PLoS One. 2021 Dec 9;16(12):e0261166. doi: 10.1371/journal.pone.0261166 (PMC8659297; doi:10.1371/journal.pone.0261166)
Supplement: S3 File — (XLSX) [file pone.0261166.s003.xlsx]

## Sheet: Sheet1
ID	Title	Journal	Author	Full reference	Year	Country	Q1	Q2	Q3	Q4	Q5	Q6	Q7	Q8	Q9	Q10	Sum "Yes"	Total questions	%	Eval	Comment
238	Changing pattern of fascioliasis prevalence early in the 3rd millennium in Dakahlia Governorate, Egypt: an update	Egyptian Society of Parasitology. Journal	Adarosy, H A; Gad, Y Z; El-Baz, S A; El-Shazly, A M	Adarosy, H., Gad, Y., El-Baz, S., & El-Shazly, A. (2013). Changing pattern of fascioliasis prevalence early in the 3rd milennium in Dakahlia Governate, Egypt: un update. Journal of Egyptian Society of Parasitology, 43(1), 275–286.	2013	Egypt	Yes	Unc	Unc	No	Unc	Yes	Unc	No	No	Yes	3	10	30	Weak
312	Clinical signs and household characteristics associated with human fascioliasis among rural population in Egypt: a case-control study	Parassitologia	Curtale, F; Mas-Coma, S; Hassanein, Y A El Wahab; Barduagni, P; Pezzotti, P; Savioli, L	Curtale, F., Mas-Coma, S., Hassanein, Y. A. W., Barduagni, P., Pezzotti, P., & Savioli, L. (2003). Clinical signs and household characteristics associated with human fascioliasis among rural population in Egypt: A case-control study. Parassitologia, 45(1), 5–11.	2003	Egypt	Yes	Yes	Unc	No	NA	Yes	Unc	Yes	Yes	Yes	6	9	66.6667	Moderate	Non-prevalence study aim
303	Clinical trial of Mirazid in treatment of human fascioliasis, Ezbet El-Bakly (Tamyia Center) Al-Fayoum Governorate	Egyptian Society of Parasitology. Journal	Abo-Madyan, Ahmed A; Morsy, Tosson A; Motawea, Saad M; Morsy, Ayman T A	Abo-Madyan, A. A., Morsy, T. A., Motawea, S. M., & Morsy, A. T. A. (2004). Clinical trial of Mirazid in treatment of human fascioliasis, Ezbet El-Bakly (Tamyia Center) Al-Fayoum Governorate. Journal of the Egyptian Society of Parasitology, 34(3), 807–818.	2004	Egypt	Yes	Yes	Unc	No	Yes	Yes	Unc	No	NA	NA	4	8	50	Moderate	Non-prevalence study aim
322	Clinico-epidemiological study of human fascioliasis in an endemic focus in Dakahlia Governorate, Egypt	Egyptian Society of Parasitology. Journal	el-Shazly, A M; Soliman, M; Gabr, A; Haseeb, A N; Morsy, A T; Arafa, M A; Morsy, T A	El-Shazly, A., Soliman, M., Gabr, A., Haseeb, A., Morsy, A., Arafa, M., & Morsy, T. (2001). Clinico-epidemiological study of human fascioliasis in an endemic focus in Dakahlia Governate, Egypt. Journal of Egyptian Society of Parasitology, 31(3), 725–736.	2001	Egypt	Yes	Yes	Unc	No	Unc	Yes	Unc	Unc	NA	NA	3	8	37.5	Weak
66	Diagnosis of human fascioliasis in Arusha region, northern Tanzania by microscopy and clinical manifestations in patients	BMC infectious diseases	Lukambagire, Abdul-Hamid Settenda; Mchaile, Deborah N; Nyindo, Mramba	Lukambagire, A. H. S., Mchaile, D. N., & Nyindo, M. (2015). Diagnosis of human fascioliasis in Arusha region, northern Tanzania by microscopy and clinical manifestations in patients. BMC Infectious Diseases, 15(1), 1–8. https://doi.org/10.1186/s12879-015-1326-9	2015	Tanzania	Yes	Unc	Unc	Yes	Unc	Yes	Yes	Unc	NA	Yes	5	9	55.5556	Moderate
134	Distribution of human fascioliasis by age and gender among rural population in the Nile Delta, Egypt	Journal of Tropical Pediatrics	Curtale, Filippo; Abd El-Wahab Hassanein, Yehia; El Wakeel, Aly; Mas-Coma, Santiago; Montresore, Antonio	Curtale, F., El-Wahab Hassanein, Y. A., El Wakeel, A., Mas-Coma, S., & Montresor, A. (2003). Distribution of human fascioliasis by age and gender among rural population in the Nile Delta, Egypt. Journal of Tropical Pediatrics, 49(5), 264–268. https://doi.org/10.1093/tropej/49.5.264	2003	Egypt	Yes	Yes	Yes	Yes	Unc	Yes	Yes	Yes	No	Yes	8	10	80	Strong
98	Efficacy and safety of artemether in the treatment of chronic fascioliasis in Egypt: exploratory phase-2 trials	PLoS neglected tropical diseases	Keiser, Jennifer; Sayed, Hanan; el-Ghanam, Maged; Sabry, Hoda; Anani, Saad; el-Wakeel, Aly; Hatz, Christoph; Utzinger, JÃ¼rg; el-Din, Sayed Seif; el-Maadawy, Walaa; Botros, Sanaa	Keiser, J., Sayed, H., El-Ghanam, M., Sabry, H., Anani, S., El-Wakeel, A., … Botros, S. (2011). Efficacy and safety of artemether in the treatment of chronic fascioliasis in Egypt: Exploratory phase-2 trials. PLoS Neglected Tropical Diseases, 5(9), e1285. https://doi.org/10.1371/journal.pntd.0001285	2011	Egypt	Yes	Unc	Yes	No	Unc	Yes	Yes	Yes	NA	NA	5	8	62.5	Moderate	Non-prevalence study aim
448	Epidemiological studies on Fasciola hepatica in Gafsa Oases (south west of Tunisia)	Parasite	HammamiH; Hamed, N; Ayadi, A	Hammami, H., Hamed, N., & Ayadi, A. (2007). Epidemiological studies on Fasciola hepatica in Gafsa oases (South West of Tunisia) . Parasite, 14(3), 261–264. https://doi.org/10.1051/parasite/2007143261	2007	Tunisia	Yes	Yes	Unc	No	Unc	Unc	Unc	Unc	NA	NA	2	8	25	Weak
88	Epidemiology of human fascioliasis and intestinal parasitosis among schoolchildren in Lake Tana Basin, northwest Ethiopia	Royal Society of Tropical Medicine and Hygiene. Transactions	Fentie, Tsegaw; Erqou, Sebhat; Gedefaw, Molla; Desta, Almaw	Fentie, T., Erqou, S., Gedefaw, M., & Desta, A. (2013). Epidemiology of human fascioliasis and intestinal parasitosis among schoolchildren in Lake Tana Basin, northwest Ethiopia. Transactions of the Royal Society of Tropical Medicine and Hygiene, 107(8), 480–486.	2013	Ethiopia	Yes	Yes	Yes	Yes	Yes	Yes	Unc	Yes	Yes	Yes	9	10	90	Strong
251	Evaluation of two doses of triclabendazole in treatment of patients with combined schistosomiasis and fascioliasis	Eastern Mediterranean Health Journal	Osman, M M; Shehab, A Y; Zaki, A; Farag, H F	Osman, M. M., Shehab, A. Y., Zaki, A., & Farag, H. F. (2011). Evaluation of two doses of triclabendazole in treatment of patients with combined schistosomiasis and fascioliasis. Eastern Mediterranean Health Journal, 17(04), 266–270. https://doi.org/10.26719/2011.17.4.266	2011	Egypt	Yes	Yes	Unc	No	Yes	Yes	Yes	Unc	NA	NA	5	8	62.5	Moderate	Non-prevalence study aim
41	Focal hepatic lesions in Egyptian infants and children: the pediatric hepatologist perspective	Minerva Pediatrica	El-KaraksyHanaa M; Mogahed, Engy; El-Sayed, Rokaya; El-Raziky, Mona; Sheba, Maha; Besheer, Mahmoud; Elkiki, Hassan; Ghita, Haytham	El-Karaksy, H., Mogahed, E., El-Sayed, R., El-Raziky, M., Sheba, M., Besheer, M., … Ghita, H. (2018). Focal hepatic lesions in Egyptian infants and children: the pediatric hepatologist perspective. Minerva Pediatrica, 70(1), 35–45.	2018	Egypt	Yes	Yes	Unc	No	Unc	Unc	Unc	Yes	NA	NA	3	8	37.5	Weak	Non-prevalence study aim
32	Gastrointestinal helminths in farmers and their ruminant livestock from the Coastal Savannah zone of Ghana	PARASITOLOGY RESEARCH	Squire, SA; Yang, RC; Robertson, I; Ayi, I; Squire, DS; Ryan, U	Squire, S. A., Yang, R., Robertson, I., Ayi, I., Squire, D. S., & Ryan, U. (2018). Gastrointestinal helminths in farmers and their ruminant livestock from the Coastal Savannah zone of Ghana. Parasitology Research, 117(10), 3183–3194. https://doi.org/10.1007/s00436-018-6017-1	2018	Ghana	Yes	Unc	Yes	No	No	Yes	Unc	Yes	NA	NA	4	8	50	Moderate
326	Hepatic fibrosis due to fascioliasis and/or schistosomiasis in Abis 1 village, Egypt	Eastern Mediterranean Health Journal	Abou-Basha, L M; Salem, A; Osman, M; el-Hefni, S; Zaki, A	Abou-Basha, L., Salem, A., Osman, M., El-Hefni, S., & Zaki, A. (2000). Hepatic fibrosis due to fascioliasis and/or schistosomiasis in Abis 1 village, Egypt. La Revue de Santé de La Méditerranée Orientale, 3(5/6), 870–878.	2000	Egypt	Yes	Unc	Unc	No	No	Yes	Unc	Yes	No	Yes	4	10	40	Weak
ADD4	Human fascioliasis, an emerging public health problem in the Nile Delta, Egypt	Research and reviews in parasitology	Curtale, F, Wakeel, A, Mas-Coma, S, Savioli, L	Curtale, F., Hammoud, E. S., El-Wakeel, A., Mas-Coma, S., & Savioli, L. (2000). Human Fascioliasis, an emerging public health problem in the Nile Delta, Egypt. Research and Reviews in Parasitology, 60(3–4), 129–134.	2000	Egypt	Yes	Yes	Unc	No	Unc	Yes	Yes	Yes	NA	NA	5	8	62.5	Moderate
133	Hyperendemic fascioliasis associated with schistosomiasis in villages in the Nile Delta of Egypt	Am J Trop Med Hyg. 2003 Oct	Esteban JG, Gonzalez C, Curtale F, MuÃ±oz-Antoli C, Valero MA, Bargues MD, el-Sayed M, el-Wakeel AA, Abdel-Wahab Y, Montresor A, Engels D, Savioli L, Mas-Coma S.	Esteban, J.-G., Gonzalez, C., Curtale, F., Muñoz-Antoli, C., Valero, M., Bargues, M., … Mas-Coma, S. (2003). Hyperendemic fascioliasis associated with schistosomiasis in villages in the Nile Delta of Egypt. American Journal of Tropical Medicine and Hygiene, 69(4), 429–437.	2003	Egypt	Yes	Yes	Unc	Yes	Unc	Yes	Yes	Yes	No	Yes	7	10	70	Moderate
453	Intestinal helminth parasites in school children in Iragbiji, boripe local government, Osun state, Nigeria	African Journal of Biomedical Research	Ijagbone, I.F; Olagunju, T.F	Ijagbone, I., & Olagunju, T. (2006). Intestinal helminth parasites in school children in Iragbiji , Boripe Local Government, Osun State, Nigeria. African Journal of Biomedical Research, 9, 63–66.	2006	Nigeria	Yes	Yes	Unc	No	Unc	Yes	Unc	Unc	NA	Yes	4	9	44.4444	Weak
ADD3	Intestinal parasites in Dakahlia governorate, with different techniques in diagnosing protozoa	J Egypt Soc Parasitol. 2006 Dec	El Shazly AM, Awad SE, Sultan DM, Sadek GS, Khalil HH, Morsy TA.	El-Shazly, A., Awad, S., Sultan, D., Sadek, G., Khalil, H., & Morsy, T. (2006). Intestinal parasites in Dakahlia Governate, with different techniques in diagnosing protozoa. Journal of Egyptian Society of Parasitology, 36(3), 1023–1034.	2006	Egypt	No	Unc	Unc	No	Unc	Yes	Unc	Unc	NA	NA	1	8	12.5	Weak
267	Past and present situation of human fascioliasis in Dakahlia Governorate, Egypt	J Egypt Soc Parasitol. 2009 Apr	El-Shazly AM, El-Beshbishi SN, Azab MS, El-Malky M, Abdeltawab AH, Morsy AT.	El-Shazly, A. M., El-Beshbishi, S. N., Azab, M. S., El-Malky, M., Abdeltawab, A. H., & Morsy, A. T. A. (2009). Past and present situation of human fascioliasis in Dakahlia Governorate, Egypt. Journal of the Egyptian Society of Parasitology, 39(1), 247–262.	2009	Egypt	Yes	Yes	Unc	No	Unc	Yes	Unc	Unc	NA	Unc	3	9	33.3333	Weak
371	Prevalence of geohelminthes in school children in some parts of Lokoja, Kogi state, north-central Nigeria	Bayero Journal of Pure and Applied Sciences	Shitta, K.B.; Audu, H.O.; Usman, A.Y.	Shitta, K., Audu, H., & Usman, A. (2017). Prevalence of geohelminthes in school children in some parts of Lokoja, Kogi State, North-Central Nigeria. Bayero Journal of Pure and Applied Sciences, 10(1), 151–154.	2017	Nigeria	Yes	Yes	Unc	No	Unc	Yes	Unc	Yes	No	Yes	5	10	50	Moderate
231	Prevalence of intestinal parasites in primary school children of mthatha, eastern cape province, South Africa	Ann Med Health Sci Res. 2013 Oct;3(4):511-6. doi: 10.4103/2141-9248.122064.	Nxasana N, Baba K, Bhat V, Vasaikar S.	Nxasana, N., Baba, K., Bhat, V., & Vasaikar, S. (2013). Prevalence of intestinal parasites in primary school children of Mthatha, Eastern Cape Province, South Africa. Annals of Medical and Health Sciences Research, 3(4), 511–516. https://doi.org/10.4103/2141-9248.122064	2013	South Africa	Yes	Yes	Unc	Yes	Yes	Yes	Yes	Yes	NA	NA	7	8	87.5	Strong
54	Prevalence of Strongyloides stercoralis and Other Intestinal Parasite Infections in School Children in a Rural Area of Angola: A Cross-Sectional Study	American Journal of Tropical Medicine and Hygiene	de Alegria Luisa Aznar Ruiz; Colmenares, Karen; Espasa, Mateu; Amor, Arancha; Lopez, Isabel; Nindia, Arlette; Kanjala, Joaquina; Guilherme, Domingas; Sulleiro, Elena; Barriga, BegoÃ±a; Gil, Eva; Salvador, Fernando; Bocanegra, Cristina; LÃ³pez, Teresa; Moreno, Milagros; Molina, Israel	De Alegría, M. L. A. R., Colmenares, K., Espasa, M., Amor, A., Lopez, I., Nindia, A., … Molina, I. (2017). Prevalence of Strongyloides stercoralis and other intestinal parasite infections in school children in a rural area of Angola: a cross-sectional study. American Journal of Tropical Medicine and Hygiene, 97(4), 1226–1231. https://doi.org/10.4269/ajtmh.17-0159	2017	Angola	Yes	Yes	Yes	Yes	Yes	Yes	Yes	Yes	NA	NA	8	8	100	Strong
211	Serum Micronutrients in Helminth-infected Pregnant Women and Children: Suggestions for Differential Supplementation During Anhelminthic Treatment	Annals of global health	ArinolaGaniyu Olatunbosun; Morenikeji, Olajumoke Abimbola; Akinwande, Kazeem Sanjo; Alade, Ayodele Olasoji; Olateru-Olagbegi, Oluwakemi; Alabi, Ponmile Emmanuel; Rahamon, Sheu Kadiri	Arinola, G. O., Morenikeji, O. A., Akinwande, K. S., Alade, A. O., Olateru-Olagbegi, O., Alabi, P. E., & Rahamon, S. K. (2015). Serum Micronutrients in helminth-infected pregnant women and children: Suggestions for differential supplementation during anti-helminthic treatment. Annals of Global Health, 81(5), 705–710. https://doi.org/10.1016/j.aogh.2015.10.001	2015	Nigeria	Yes	Unc	Unc	No	Unc	Yes	Unc	Yes	NA	NA	3	8	37.5	Weak
370	Species and prevalence determination of Human Intestinal Parasites among Patients attending two Medical Centers in Yola, Adamawa State, Nigeria	Journal of Applied Sciences and Environmental Management	Na'acha, E; Vandi, P; Chessed, G	Na’acha, E., Vandi, P., & Chessed, G. (2017). Species and prevalence determination of Human Intestinal Parasites among Patients attending two Medical Centers in Yola, Adamawa State, Nigeria. Journal of Applied Sciences and Environmental Management, 21(3), 431. https://doi.org/10.4314/jasem.v21i3.4	2017	Nigeria	Yes	Unc	Unc	Yes	Unc	Yes	Unc	Yes	NA	NA	4	8	50	Moderate
286	The reflection of control programs of parasitic diseases upon gastrointestinal helminthiasis in Dakahlia Governorate, Egypt	J Egypt Soc Parasitol. 2006 Aug	el-Shazly AM, el-Nahas HA, Soliman M, Sultan DM, Abedl Tawab AH, Morsy TA.	El-Shazly, A., El-Nahas, H., Soliman, M., Sultan, D., Abedl Tawab, A., & Morsy, T. (2006). The reflection of control programmes of parasitic diseases. Journal of Egyptian Society of Parasitology, 36(2), 467–480.	2006	Egypt	Yes	Yes	Unc	No	Unc	Yes	Unc	Unc	NA	NA	3	8	37.5	Weak
306	Vegetable-transmitted parasites among inhabitants of El-Prince, Alexandria and its relation to housewives' knowledge and practices	J Egypt Public Health Assoc. 2004	Fawzi M, El-Sahn AA, Ibrahim HF, Shehata AI.	Fawzi, M., El-Sahn, A. A., Ibrahim, H. F., & Shehata, A. I. (2004). Vegetable-transmitted parasites among inhabitants of El-Prince, Alexandria and its relation to housewives’ knowledge and practices. The Journal of the Egyptian Public Health Association, 79(1–2), 13–29.	2004	Egypt	Yes	Yes	Unc	No	Unc	Yes	Unc	Yes	NA	Yes	5	9	55.5556	Moderate
419	Enteric parasitic infections in HIV-infected patients with low CD4 counts in Toto, Nigeria.	Pakistan Journal of Medical Sciences	Abaver, D. T.; Nwobegahay, J. M.; Goon, D. T.; Iweriebor, B. C.; Khoza, L. B.	Abaver, D. T., Nwobegahay, J. M., Goon, D. T., Iweriebor, B. C., & Khoza, L. B. (2012). Enteric parasitic infections in HIV-infected patients with low CD4 counts in Toto, Nigeria. Pakistan Journal of Medical Sciences, 28(4), 630–633. https://doi.org/10.12669/pjms.284.2296	2012	Nigeria	Yes	Unc	Unc	Yes	Unc	Yes	Unc	Yes	NA	NA	4	8	50	Moderate
412	Helminths of the gastrointestinal tract among children in Kano, Northern Nigeria.	Asian Journal of Biological and Life Sciences	Ihesiulor, G. U.; Kashibu, E.; Azeez-Akande, O.; Imoru, M.	Ihesiulor, G., Kashibu, E., Azeez-Akande, O., & Imoru, M. (2013). Helminths of the gastrointestinal tract among children in Kano, Northern Nigeria. Asian Journal of Biological Life Sciences, 2(2), 122–126.	2013	Nigeria	Yes	Yes	Unc	No	Unc	Yes	Unc	Unc	NA	NA	3	8	37.5	Weak
463	Gastrointestinal parasites of school children in Benin city, Nigeria.	Iranian Journal of Public Health	Okaka, C. E.; Awharitoma, A. O.; Okonji, J. N.	Okaka, C., Awharitoma, A., & Okonji, J. (2000). Gastrointestinal parasites of school children in Benin city, Nigeria. Iranian Journal of Public Health, 29(1–4), 1–12.	2000	Nigeria	Yes	Unc	Unc	No	Unc	Yes	Unc	Unc	NA	NA	2	8	25	Weak
